# Supplementary material for: Safety and Immunogenicity of Live Viral Vaccines in a Multicenter Cohort of Pediatric Transplant Recipients
Source: PubMed Central journal article supplement (PMC10570873; doi:10.1001/jamanetworkopen.2023.37602), 2023-10-12
Supplement: jamanetwopen-e2337602-s001.pdf [file jamanetwopen-e2337602-s001.pdf]

## Supplemental Online Content

Feldman AG, Beaty BL, Ferrolino JA, et al. Safety and immunogenicity of live viral vaccines in a multicenter cohort of pediatric transplant recipients. *JAMA Netw Open*. 2023;6(10):e2337602. doi:10.1001/jamanetworkopen.2023.37602

**eTable.** Individual Transplant Center Criteria for Posttransplant Live Vaccine Eligibility (N = 18)

This supplemental material has been provided by the authors to give readers additional information about their work.

**eTable. Individual Transplant Center Criteria for Posttransplant Live Vaccine Eligibility (N = 18)**

| <b>Eligibility Criteria</b>                                                       | <b>No (%)</b> |
|-----------------------------------------------------------------------------------|---------------|
| Live vaccine history and/or antibodies at enrollment                              |               |
| Negative antibodies required at enrollment                                        | 10 (56)       |
| No history of any live vaccines or negative antibodies required at enrollment     | 2 (11)        |
| Incomplete history of live vaccines or negative antibodies required at enrollment | 6 (33)        |
| Single organ transplant only                                                      | 14 (78)       |
| Time from transplant (months)                                                     |               |
| 6-11 months                                                                       | 1 (6)         |
| 12-17 months                                                                      | 12 (67)       |
| 18-23 months                                                                      | 3 (17)        |
| 24+ months                                                                        | 1 (6)         |
| Not specified                                                                     | 1 (6)         |
| Time from acute cellular rejection (months)                                       |               |
| 2- 5 months                                                                       | 4 (22)        |
| 6-11 months                                                                       | 8 (44)        |
| 12+ months                                                                        | 2 (11)        |
| Not specified                                                                     | 4 (22)        |
| Epstein Barr Virus PCR                                                            |               |
| Undetectable                                                                      | 2 (11)        |
| <5000 IU/mL                                                                       | 5 (28)        |
| No specific level required or not routinely assessed                              | 11 (61)       |
| Cytomegalovirus PCR                                                               |               |
| Undetectable                                                                      | 4 (22)        |
| <5000 IU/mL                                                                       | 2 (11)        |
| No specific level required or not routinely assessed                              | 12 (67)       |
| Time from thymoglobulin (ATG)                                                     |               |
| No history of ATG                                                                 | 4 (22)        |
| At least 6 months                                                                 | 2 (11)        |
| At least 12 months                                                                | 7 (39)        |
| Not specified                                                                     | 5 (28)        |
| Time from rituximab                                                               |               |
| No history of rituximab                                                           | 4 (22)        |
| At least 6 months                                                                 | 2 (11)        |
| At least 12 months                                                                | 8 (44)        |
| Not specified                                                                     | 4 (22)        |
| Time from Alemtuzumab                                                             |               |
| No history of Alemtuzumab                                                         | 5 (28)        |
| At least 6 months                                                                 | 1 (6)         |
| At least 24 months                                                                | 6 (33)        |
| Not specified                                                                     | 6 (33)        |
| Time from intravenous immunoglobulin (IVIG)                                       |               |
| Per Red Book/Centers for Disease Control and Prevention                           | 13 (72)       |
| Not specified                                                                     | 5 (28)        |
| Time from blood transfusion                                                       |               |
| At least 6 months                                                                 | 12 (67)       |
| Not specified                                                                     | 6 (33)        |
| Absolute lymphocyte count                                                         |               |
| >750 cells/ $\mu$ L                                                               | 1 (6)         |
| Normal for age                                                                    | 10 (56)       |
| No specific requirement                                                           | 7 (39)        |
| CD4 level                                                                         |               |
| 500-700 cells/mm <sup>3</sup>                                                     | 6 (33)        |

|                                                         |         |
|---------------------------------------------------------|---------|
| No specific requirement                                 | 12 (67) |
| Immunoglobulin G level                                  |         |
| 75% of normal for age                                   | 1 (6)   |
| Normal for age                                          | 7 (39)  |
| No specific requirement                                 | 10 (56) |
| Single immunosuppressive agent                          | 4 (22)  |
| Maximum tacrolimus, sirolimus, or combined trough level |         |
| 0-5.9                                                   | 8 (44)  |
| 6-7.9                                                   | 8 (44)  |
| No specific                                             | 2 (11)  |
| Steroids permitted                                      |         |
| Yes                                                     | 11 (61) |
| Imuran permitted                                        |         |
| Yes                                                     | 5 (28)  |
| Cellcept permitted                                      |         |
| Yes                                                     | 6 (33)  |

Individual centers also specified no serious infections resulting in hospitalization in the past 6 months (2 centers), reliable history of phone communication (2 centers), no chemotherapy in the last 12 months (1 center), no patients with history of re-transplantation (1 center), no COVID in the past 6 months (1 center), no post-transplant lymphoproliferative disease in the last 6 months (1 center)
