# Supplementary material for: Safety and Immunogenicity of Live Viral Vaccines in a Multicenter Cohort of Pediatric Transplant Recipients
Source: PubMed Central journal article supplement (PMC10570873; doi:10.1001/jamanetworkopen.2023.37602), 2023-10-12
Supplement: jamanetwopen-e2337602-s002.pdf [file jamanetwopen-e2337602-s002.pdf]

## Data Sharing Statement

Feldman. Safety and Immunogenicity of Live Viral Vaccines in a Multicenter Cohort of Pediatric Transplant Recipients. *JAMA Netw Open*. Published October 12, 2023.

doi:10.1001/jamanetworkopen.2023.37602

### Data

**Data available:** Yes

**Data types:** Data (not involving human participants), Data dictionary, Deidentified participant data

**How to access data:** available from author

**When available:** With publication

### Supporting Documents

**Document types:** Statistical/analytic code

**How to access documents:** available from author

**When available:** With publication

### Additional Information

**Who can access the data:** none

**Types of analyses:** any purpose

**Mechanisms of data availability:** from author with a signed data access agreement

**Any additional restrictions:** none
